# Supplementary material for: Single Nucleotide Polymorphisms in the Vitamin D Metabolic Pathway as Survival Biomarkers in Colorectal Cancer
Source: MDPI journal article supplement (doi:10.3390/cancers15164077), 2023-08-12
Supplement: s1 [file s1]

Table S7. Frequencies of the *VDR* haplotypes in 127 CRC patients.

| <b><i>VDR</i> rs1544410 (BsmI)</b> | <b><i>VDR</i> rs7975232 (ApaI)</b> | <b><i>VDR</i> rs731236 (TaqI)</b> | <b>Total</b> | <b>Cumulative frequency</b> |
|------------------------------------|------------------------------------|-----------------------------------|--------------|-----------------------------|
| T                                  | A                                  | G                                 | 0.3766       | 0.3766                      |
| C                                  | C                                  | A                                 | 0.3706       | 0.7472                      |
| C                                  | A                                  | A                                 | 0.1633       | 0.9105                      |
| T                                  | C                                  | A                                 | 0.0369       | 0.9474                      |
| T                                  | A                                  | A                                 | 0.0277       | 0.9750                      |
| C                                  | A                                  | G                                 | 0.0112       | 0.9862                      |
| C                                  | C                                  | G                                 | 0.0100       | 0.9963                      |
| T                                  | C                                  | G                                 | 0.0037       | 1                           |
