# Supplementary material for: Single Nucleotide Polymorphisms in the Vitamin D Metabolic Pathway as Survival Biomarkers in Colorectal Cancer
Source: MDPI journal article supplement (doi:10.3390/cancers15164077), 2023-08-12
Supplement: s1 [file s1]

Table S16. Associations between VDR haplotypes and progression free survival in 127 CRC patients.

| VDR Haplotypes                                                                                                                                                   | Estimation | St Error | T-Test | HRR (IC95%)           | p-value |
|------------------------------------------------------------------------------------------------------------------------------------------------------------------|------------|----------|--------|-----------------------|---------|
| TCA                                                                                                                                                              | -0.970     | 0.661    | -1.466 | 0.378 [0.103 - 1.386] | 0.142   |
| TAA                                                                                                                                                              | 0.032      | 0.543    | 0.060  | 1.033 [0.356 - 2.997] | 0.951   |
| CCA                                                                                                                                                              | -0.253     | 0.200    | -1.262 | 0.775 [0.523 - 1.150] | 0.206   |
| CCG                                                                                                                                                              | -0.571     | 0.920    | -0.621 | 0.564 [0.092 - 3.430] | 0.534   |
| CAA                                                                                                                                                              | 0.068      | 0.239    | 0.286  | 1.071 [0.669 - 1.714] | 0.774   |
| CAG                                                                                                                                                              | 0.037      | 0.852    | 0.043  | 1.038 [0.195 - 5.520] | 0.964   |
| Ref. haplotype = TAG<br>-2x Log-likelihood (with covariates) =460.739477<br>-2 x Log-likelihood (without covariates) = 466.690810<br>(df = 6)<br>p-value = 0.429 |            |          |        |                       |         |
