# Supplementary material for: Single Nucleotide Polymorphisms in the Vitamin D Metabolic Pathway as Survival Biomarkers in Colorectal Cancer
Source: MDPI journal article supplement (doi:10.3390/cancers15164077), 2023-08-12
Supplement: s1 [file s1]

Table S14. Distribution of VDR haplotypes in progression free survival in 127 CRC patients (censored/uncensored).

| <i>VDR</i> Haplotypes | Haplotypes frequencies in<br>Censored (%) | Haplotypes frequencies in<br>Uncensored (%) |
|-----------------------|-------------------------------------------|---------------------------------------------|
| TCA                   | 0.053268                                  | 0.023750                                    |
| TAA                   | 0.018345                                  | 0.039348                                    |
| TAG                   | 0.350923                                  | 0.410116                                    |
| CCA                   | 0.411077                                  | 0.312259                                    |
| CCG                   | 0.014528                                  | 0.012205                                    |
| CAA                   | 0.144070                                  | 0.187143                                    |
| CAG                   | 0.007789                                  | 0.015179                                    |
