# Supplementary material for: Single Nucleotide Polymorphisms in the Vitamin D Metabolic Pathway as Survival Biomarkers in Colorectal Cancer
Source: MDPI journal article supplement (doi:10.3390/cancers15164077), 2023-08-12
Supplement: s1 [file s1]

Table S10. Distribution of VDR haplotypes in overall survival in 127 CRC patients (censored/uncensored).

| <i>VDR</i> Haplotypes | Haplotypes frequencies in<br>Censored (%) | Haplotypes frequencies in<br>Uncensored (%) |
|-----------------------|-------------------------------------------|---------------------------------------------|
| TCA                   | 0.033802                                  | 0.052467                                    |
| TAA                   | 0.015951                                  | 0.045739                                    |
| TAG                   | 0.388519                                  | 0.358315                                    |
| CCA                   | 0.405105                                  | 0.295130                                    |
| CCG                   | 0.017883                                  | 0.011098                                    |
| CAA                   | 0.137735                                  | 0.215359                                    |
| CAG                   | 0.001006                                  | 0.021891                                    |
