# Supplementary material for: Single Nucleotide Polymorphisms in the Vitamin D Metabolic Pathway as Survival Biomarkers in Colorectal Cancer
Source: MDPI journal article supplement (doi:10.3390/cancers15164077), 2023-08-12
Supplement: s1 [file s1]

Table S12. Associations between VDR haplotypes and overall survival in 127 CRC patients.

| VDR Haplotypes                                                                                                                                                  | Estimation | St Error | T-Test | HRR (IC95%)            | p-value |
|-----------------------------------------------------------------------------------------------------------------------------------------------------------------|------------|----------|--------|------------------------|---------|
| TCA                                                                                                                                                             | -0.186     | 0.530    | -0.352 | 0.829[0.293 - 2.347]   | 0.724   |
| TAA                                                                                                                                                             | 0.464      | 0.535    | 0.868  | 1.591 [0.557 - 4.548]  | 0.385   |
| CCA                                                                                                                                                             | -0.240     | 0.240    | -0.997 | 0.786 [0.490 - 1.260]  | 0.318   |
| CCG                                                                                                                                                             | -0.573     | 1.022    | -0.561 | 0.563 [0.075 - 4.176]  | 0.574   |
| CAA                                                                                                                                                             | 0.243      | 0.259    | 0.939  | 1.276 [0.767 - 2.123]  | 0.347   |
| CAG                                                                                                                                                             | 1.176      | 0.780    | 1.507  | 3.244 [0.702 - 14.980] | 0.131   |
| Ref. haplotype = TAG<br>-2x Log-likelihood (with covariates) = 366.533718<br>-2 x Log-likelihood (without covariates) =373.280064<br>(df = 6)<br>p-value =0.133 |            |          |        |                        |         |
