# Supplementary material for: Single Nucleotide Polymorphisms in the Vitamin D Metabolic Pathway as Survival Biomarkers in Colorectal Cancer
Source: MDPI journal article supplement (doi:10.3390/cancers15164077), 2023-08-12
Supplement: s1 [file s1]

Table S3. Minor allele frequencies of SNPs.

| Chr                                           | SNP        | Gen            | Minor Allele | Major Allele | MAF    |
|-----------------------------------------------|------------|----------------|--------------|--------------|--------|
| 4                                             | rs7041     | <i>GC</i>      | A            | C            | 0.4921 |
| 11                                            | rs10741657 | <i>CYP2R1</i>  | A            | G            | 0.3307 |
| 12                                            | rs1544410  | <i>VDR</i>     | T            | C            | 0.4449 |
| 12                                            | rs11568820 | <i>VDR</i>     | T            | C            | 0.2244 |
| 12                                            | rs2228570  | <i>VDR</i>     | A            | G            | 0.3425 |
| 12                                            | rs7975232  | <i>VDR</i>     | C            | A            | 0.4213 |
| 12                                            | rs731236   | <i>VDR</i>     | G            | A            | 0.4016 |
| 12                                            | rs3782130  | <i>CYP27B1</i> | C            | G            | 0.2717 |
| 12                                            | rs4646536  | <i>CYP27B1</i> | G            | A            | 0.2756 |
| 12                                            | rs703842   | <i>CYP27B1</i> | G            | A            | 0.2756 |
| 12                                            | rs10877012 | <i>CYP27B1</i> | T            | G            | 0.2717 |
| 20                                            | rs6068816  | <i>CYP24A1</i> | T            | C            | 0.1890 |
| 20                                            | rs4809957  | <i>CYP24A1</i> | G            | A            | 0.2087 |
| Chr, Chromosome. MAF, Minor allele frequency. |            |                |              |              |        |
