# Supplementary material for: Single Nucleotide Polymorphisms in the Vitamin D Metabolic Pathway as Survival Biomarkers in Colorectal Cancer
Source: MDPI journal article supplement (doi:10.3390/cancers15164077), 2023-08-12
Supplement: s1 [file s1]

Table S5. Hardy-Weinberg Equilibrium (PFS).

| Chr | SNP        | Sample     | Gen     | Minor Allele | Major Allele | Genotype counts | Observed heterozygosity | Expected heterozygosity | p-value       |
|-----|------------|------------|---------|--------------|--------------|-----------------|-------------------------|-------------------------|---------------|
| 4   | rs7041     | All        | GC      | A            | C            | 27/71/29        | 0.5591                  | 0.4999                  | 0.2169        |
| 4   | rs7041     | Success    | GC      | A            | C            | 8/39/9          | 0.6964                  | 0.4998                  | <b>0.0068</b> |
| 4   | rs7041     | No Success | GC      | A            | C            | 19/32/20        | 0.4507                  | 0.4999                  | 0.4759        |
| 11  | rs10741657 | All        | CYP2R1  | A            | G            | 14/56/57        | 0.4409                  | 0.4427                  | 1             |
| 11  | rs10741657 | Success    | CYP2R1  | A            | G            | 8/23/25         | 0.4107                  | 0.4539                  | 0.5554        |
| 11  | rs10741657 | No Success | CYP2R1  | A            | G            | 6/33/32         | 0.4648                  | 0.4329                  | 0.7833        |
| 12  | rs1544410  | All        | VDR     | T            | C            | 33/47/47        | 0.3701                  | 0.4939                  | <b>0.0067</b> |
| 12  | rs1544410  | Success    | VDR     | T            | C            | 16/21/19        | 0.375                   | 0.4986                  | 0.0649        |
| 12  | rs1544410  | No Success | VDR     | T            | C            | 17/26/28        | 0.3662                  | 0.4880                  | <b>0.0499</b> |
| 12  | rs11568820 | All        | VDR     | T            | C            | 6/45/76         | 0.3543                  | 0.3481                  | 1             |
| 12  | rs11568820 | Success    | VDR     | T            | C            | 1/23/32         | 0.4107                  | 0.3468                  | 0.2604        |
| 12  | rs11568820 | No Success | VDR     | T            | C            | 5/22/44         | 0.3099                  | 0.3491                  | 0.3203        |
| 12  | rs2228570  | All        | VDR     | A            | G            | 12/63/52        | 0.4961                  | 0.4504                  | 0.3255        |
| 12  | rs2228570  | Success    | VDR     | A            | G            | 8/22/26         | 0.3929                  | 0.4483                  | 0.3756        |
| 12  | rs2228570  | No Success | VDR     | A            | G            | 4/41/26         | 0.5775                  | 0.4520                  | <b>0.0338</b> |
| 12  | rs7975232  | All        | VDR     | C            | A            | 28/51/48        | 0.4016                  | 0.4876                  | <b>0.0468</b> |
| 12  | rs7975232  | Success    | VDR     | C            | A            | 10/19/27        | 0.3393                  | 0.4539                  | 0.0753        |
| 12  | rs7975232  | No Success | VDR     | C            | A            | 18/32/21        | 0.4507                  | 0.4991                  | 0.4756        |
| 12  | rs731236   | All        | VDR     | G            | A            | 27/48/52        | 0.3780                  | 0.4806                  | <b>0.0167</b> |
| 12  | rs731236   | Success    | VDR     | G            | A            | 15/19/22        | 0.3393                  | 0.4922                  | <b>0.0283</b> |
| 12  | rs731236   | No Success | VDR     | G            | A            | 12/29/30        | 0.4085                  | 0.4679                  | 0.3120        |
| 12  | rs3782130  | All        | CYP27B1 | C            | G            | 13/43/71        | 0.3386                  | 0.3957                  | 0.1159        |
| 12  | rs3782130  | Success    | CYP27B1 | C            | G            | 6/15/35         | 0.2679                  | 0.3659                  | 0.0614        |
| 12  | rs3782130  | No Success | CYP27B1 | C            | G            | 7/28/36         | 0.3944                  | 0.4166                  | 0.7749        |
| 12  | rs4646536  | All        | CYP27B1 | G            | A            | 14/42/71        | 0.3307                  | 0.3993                  | 0.0727        |
| 12  | rs4646536  | Success    | CYP27B1 | G            | A            | 6/15/35         | 0.2679                  | 0.3659                  | 0.0615        |
| 12  | rs4646536  | No Success | CYP27B1 | G            | A            | 8/27/36         | 0.3803                  | 0.4222                  | 0.4051        |
| 12  | rs703842   | All        | CYP27B1 | G            | A            | 14/42/71        | 0.3307                  | 0.3993                  | 0.0727        |
| 12  | rs703842   | Success    | CYP27B1 | G            | A            | 6/15/35         | 0.2679                  | 0.3659                  | 0.0615        |
| 12  | rs703842   | No Success | CYP27B1 | G            | A            | 8/27/36         | 0.3803                  | 0.4222                  | 0.4051        |
| 12  | rs10877012 | All        | CYP27B1 | T            | G            | 12/45/70        | 0.3543                  | 0.3957                  | 0.2617        |
| 12  | rs10877012 | Success    | CYP27B1 | T            | G            | 6/15/35         | 0.2679                  | 0.3659                  | 0.0615        |
| 12  | rs10877012 | No Success | CYP27B1 | T            | G            | 6/30/35         | 0.4225                  | 0.4166                  | 1             |
| 20  | rs6068816  | All        | CYP24A1 | T            | C            | 10/28/89        | 0.2205                  | 0.3065                  | <b>0.0029</b> |
| 20  | rs6068816  | Success    | CYP24A1 | T            | C            | 07/10/1939      | 0.1786                  | 0.3367                  | <b>0.0012</b> |
| 20  | rs6068816  | No Success | CYP24A1 | T            | C            | 3/18/50         | 0.2535                  | 0.2809                  | 0.3994        |
| 20  | rs4809957  | All        | CYP24A1 | G            | A            | 8/37/82         | 0.2913                  | 0.3302                  | 0.1826        |
| 20  | rs4809957  | Success    | CYP24A1 | G            | A            | 2/19/35         | 0.3393                  | 0.3264                  | 1             |
| 20  | rs4809957  | No Success | CYP24A1 | G            | A            | 6/18/47         | 0.2535                  | 0.3333                  | 0.0660        |

Chr, chromosome.
