# Supplementary material for: Single Nucleotide Polymorphisms in the Vitamin D Metabolic Pathway as Survival Biomarkers in Colorectal Cancer
Source: MDPI journal article supplement (doi:10.3390/cancers15164077), 2023-08-12
Supplement: s1 [file s1]

Table S13. Influence of gene polymorphisms on progression-free survival of 127 CRC patients.

| Gen     | SNPs              | Genotype | PFS |        |          |                   |                  |           |                      |                   |         |
|---------|-------------------|----------|-----|--------|----------|-------------------|------------------|-----------|----------------------|-------------------|---------|
|         |                   |          | N   | Events | MST (mo) | CI <sub>95%</sub> | Log-rank p-value | Ref. cat. | Univariate Cox Model |                   |         |
|         |                   |          |     |        |          |                   |                  |           | HR                   | CI <sub>95%</sub> | p-value |
| VDR     | rs1544410 (BsmI)  | TT       | 33  | 16     | 73.3     | 37.0-NR           | 0.900            | -         | -                    | -                 | -       |
|         |                   | CT       | 47  | 21     | 60.6     | 30.6-NR           |                  |           | -                    | -                 | -       |
|         |                   | CC       | 47  | 19     | 75.0     | 35.0-NR           |                  |           | -                    | -                 | -       |
|         |                   | T        | 80  | 37     | 73.3     | 38.6-NR           | 0.900            | -         | -                    | -                 | -       |
|         |                   | C        | 94  | 40     | 63.3     | 38.1-NR           | 0.700            | -         | -                    | -                 | -       |
|         | rs11568820 (Cdx2) | TT       | 6   | 1      | NR       | 16.7-NR           | 0.700            | -         | -                    | -                 | -       |
|         |                   | CT       | 45  | 23     | 63.3     | 41.0-NR           |                  |           | -                    | -                 | -       |
|         |                   | CC       | 76  | 32     | 105.2    | 35.0-NR           |                  |           | -                    | -                 | -       |
|         |                   | T        | 51  | 24     | 63.3     | 41.0-NR           | 0.800            | -         | -                    | -                 | -       |
|         |                   | C        | 121 | 55     | 63.3     | 41.0-NR           | 0.500            | -         | -                    | -                 | -       |
|         | rs2228570 (FokI)  | GG       | 52  | 26     | 55.1     | 23.7-NR           | 0.050            | AG        | 1.650                | 0.934-2.916       | 0.085   |
|         |                   | AG       | 63  | 22     | 125.4    | 47.4-NR           |                  |           | 1                    | -                 | -       |
|         |                   | AA       | 12  | 8      | 19.8     | 6.23-NR           |                  |           | 2.542                | 1.126-5.742       | 0.025   |
|         |                   | G        | 115 | 48     | 75.0     | 43.8-NR           | 0.070            | G         | 1.994                | 0.939-4.232       | 0.072   |
|         |                   | A        | 75  | 30     | 105.2    | 41.0-NR           | 0.200            | -         | -                    | -                 | -       |
|         | rs7975232 (ApaI)  | AA       | 48  | 27     | 43.8     | 34.5-NR           | 0.100            | -         | -                    | -                 | -       |
|         |                   | AC       | 51  | 19     | 125.9    | 30.2-NR           |                  |           | -                    | -                 | -       |
|         |                   | CC       | 28  | 10     | NR       | 51.1-NR           |                  |           | -                    | -                 | -       |
|         |                   | A        | 99  | 46     | 60.6     | 38.1-NR           | 0.200            | -         | -                    | -                 | -       |
|         | rs731236 (TaqI)   | C        | 79  | 29     | 125.9    | 55.1-NR           | 0.040            | C         | 1.732                | 1.019-2.945       | 0.042   |
|         |                   | GG       | 27  | 15     | 41.0     | 18.6-NR           | 0.200            | -         | -                    | -                 | -       |
|         |                   | AG       | 48  | 19     | 125.4    | 59.2-NR           |                  |           | -                    | -                 | -       |
|         |                   | AA       | 52  | 22     | 63.3     | 30.2-NR           |                  |           | -                    | -                 | -       |
|         |                   | G        | 75  | 34     | 73.3     | 43.8-NR           | 0.900            | -         | -                    | -                 | -       |
| CYP27B1 | rs4646536         | A        | 100 | 41     | 105.0    | 51.1-NR           | 0.090            | A         | 1.670                | 0.916-3.046       | 0.094   |
|         |                   | AA       | 71  | 35     | 63.3     | 35.0-NR           | 0.800            | -         | -                    | -                 | -       |
|         |                   | AG       | 42  | 15     | 105.2    | 37.0-NR           |                  |           | -                    | -                 | -       |
|         |                   | GG       | 14  | 6      | NR       | 17.7-NR           |                  |           | -                    | -                 | -       |
|         |                   | A        | 113 | 50     | 73.3     | 41.0-NR           | 0.800            | -         | -                    | -                 | -       |
|         | rs3782130         | G        | 56  | 21     | 105.2    | 38.6-NR           | 0.500            | -         | -                    | -                 | -       |
|         |                   | CC       | 13  | 6      | 59.2     | 8.5-NR            | 0.700            | -         | -                    | -                 | -       |
|         |                   | CG       | 43  | 15     | 105.2    | 38.6-NR           |                  |           | -                    | -                 | -       |
|         |                   | GG       | 71  | 35     | 63.3     | 35.0-NR           |                  |           | -                    | -                 | -       |
|         |                   | C        | 56  | 21     | 105.2    | 38.6-NR           | 0.400            | -         | -                    | -                 | -       |
|         | rs10877012        | G        | 114 | 50     | 73.3     | 41.0-NR           | 0.900            | -         | -                    | -                 | -       |
|         |                   | TT       | 12  | 6      | 59.2     | 8.5-NR            | 0.400            | -         | -                    | -                 | -       |
|         |                   | GT       | 45  | 15     | 105.2    | 38.6-NR           |                  |           | -                    | -                 | -       |
|         |                   | GG       | 70  | 35     | 55.1     | 35.0-NR           |                  |           | -                    | -                 | -       |
|         |                   | T        | 57  | 21     | 105.2    | 38.6-NR           | 0.300            | -         | -                    | -                 | -       |
|         | rs703842          | G        | 115 | 50     | 73.3     | 41.0-NR           | 0.600            | -         | -                    | -                 | -       |
|         |                   | GG       | 14  | 6      | NR       | 17.7-NR           | 0.800            | -         | -                    | -                 | -       |
|         |                   | AG       | 42  | 15     | 105.2    | 37.0-NR           |                  |           | -                    | -                 | -       |
|         |                   | AA       | 71  | 35     | 63.3     | 35.0-NR           |                  |           | -                    | -                 | -       |
|         |                   | G        | 56  | 21     | 105.2    | 38.6-NR           | 0.500            | -         | -                    | -                 | -       |

|                                                                                                                     |            |    |     |    |       |           |       |    |       |             |       |
|---------------------------------------------------------------------------------------------------------------------|------------|----|-----|----|-------|-----------|-------|----|-------|-------------|-------|
| CYP24A1                                                                                                             | rs6068816  | CC | 89  | 39 | 63.3  | 43.8-NR   | 0.010 | CT | 1.241 | 0.619-2.489 | 0.543 |
|                                                                                                                     |            | CT | 28  | 10 | NR    | 38.6-NR   |       |    | 1     | -           | -     |
|                                                                                                                     |            | TT | 10  | 7  | 14.2  | 3.1-NR    |       |    | 3.585 | 1.355-9.483 | 0.010 |
|                                                                                                                     |            | C  | 117 | 49 | 75.0  | 47.4-NR   | 0.004 | C  | 3.030 | 1.361-6.743 | 0.006 |
|                                                                                                                     |            | T  | 38  | 17 | 75.0  | 19.8-NR   | 0.600 | -  | -     | -           | -     |
|                                                                                                                     | rs4809957  | GG | 8   | 2  | NR    | 34.5-NR   | 0.800 | -  | -     | -           | -     |
|                                                                                                                     |            | GA | 37  | 19 | 38.6  | 19.8-NR   |       |    |       |             |       |
|                                                                                                                     |            | AA | 82  | 35 | 75.0  | 47.4-NR   |       |    |       |             |       |
|                                                                                                                     |            | G  | 45  | 21 | 51.1  | 23.7-NR   | 0.600 | -  | -     | -           | -     |
|                                                                                                                     |            | A  | 119 | 54 | 63.3  | 41.0-NR   | 0.800 | -  | -     | -           | -     |
| CYP2R1                                                                                                              | rs10741657 | GG | 57  | 25 | 63.3  | 43.8-NR   | 1     | -  | -     | -           | -     |
|                                                                                                                     |            | AG | 56  | 23 | 125.4 | 35.0-NR   |       |    |       |             |       |
|                                                                                                                     |            | AA | 14  | 8  | 60.6  | 18.6-NR   |       |    |       |             |       |
|                                                                                                                     |            | G  | 113 | 48 | 73.3  | 41.0-NR   | 0.900 | -  | -     | -           | -     |
|                                                                                                                     |            | A  | 70  | 31 | 75.0  | 35.0-NR   | 1     | -  | -     | -           | -     |
| GC                                                                                                                  | rs7041     | AA | 27  | 8  | NR    | 60.6-NR   | 0.004 | CC | 1.149 | 0.440-2.997 | 0.777 |
|                                                                                                                     |            | AC | 71  | 39 | 38.1  | 18.5-73.3 |       |    | 2.742 | 1.321-5.691 | 0.007 |
|                                                                                                                     |            | CC | 29  | 9  | 125.9 | 105.8-NR  |       |    | 1     | -           | -     |
|                                                                                                                     |            | A  | 98  | 47 | 55.1  | 37.0-NR   | 0.030 | CC | 2.226 | 1.083-4.574 | 0.029 |
|                                                                                                                     |            | C  | 100 | 48 | 55.1  | 37.0-NR   | 0.100 | -  | -     | -           | -     |
| HR, hazard ratio. IC <sub>95%</sub> , 95% confidence interval. MST, median survival time (months). NR, not reached. |            |    |     |    |       |           |       |    |       |             |       |
