# Supplementary material for: Single Nucleotide Polymorphisms in the Vitamin D Metabolic Pathway as Survival Biomarkers in Colorectal Cancer
Source: MDPI journal article supplement (doi:10.3390/cancers15164077), 2023-08-12
Supplement: s1 [file s1]

Table S15. Distribution of *CYP27B1* haplotypes in progression free survival in 127 CRC patients (censored/uncensored).

| <i>CYP27B1</i><br>Haplotype | Haplotype frequencies in<br>Censored (%) | Haplotype frequencies in<br>Uncensored (%) |
|-----------------------------|------------------------------------------|--------------------------------------------|
| CGGG                        | 0.007063                                 | 0.000009                                   |
| CGGT                        | 0.274627                                 | 0.241062                                   |
| CGAT                        | 0.007042                                 | 0.000000                                   |
| CAGT                        | 0.007042                                 | 0.000000                                   |
| GGGG                        | 0.014085                                 | 0.000000                                   |
| GAAG                        | 0.683077                                 | 0.758920                                   |
| GAAT                        | 0.007063                                 | 0.000009                                   |
