# Supplementary material for: Single Nucleotide Polymorphisms in the Vitamin D Metabolic Pathway as Survival Biomarkers in Colorectal Cancer
Source: MDPI journal article supplement (doi:10.3390/cancers15164077), 2023-08-12
Supplement: s1 [file s1]

Table S6. Linkage disequilibrium of SNPs.

| Chr | BP       | SNP       | Gen     | Chr | BP       | SNP        | Gen     | R <sup>2</sup> | D'       |
|-----|----------|-----------|---------|-----|----------|------------|---------|----------------|----------|
| 12  | 47846052 | rs1544410 | VDR     | 12  | 47845054 | rs7975232  | VDR     | 0.373517       | 0.782038 |
| 12  | 47846052 | rs1544410 | VDR     | 12  | 47844974 | rs731236   | VDR     | 0.732418       | 0.907370 |
| 12  | 47845054 | rs7975232 | VDR     | 12  | 47844974 | rs731236   | VDR     | 0.391021       | 0.916933 |
| 12  | 57768115 | rs3782130 | CYP27B1 | 12  | 57764205 | rs4646536  | CYP27B1 | 0.949729       | 0.979861 |
| 12  | 57768115 | rs3782130 | CYP27B1 | 12  | 57768956 | rs703842   | CYP27B1 | 0.949729       | 0.979861 |
| 12  | 57768115 | rs3782130 | CYP27B1 | 12  | 57768302 | rs10877012 | CYP27B1 | 0.965225       | 0.980033 |
| 12  | 57764205 | rs4646536 | CYP27B1 | 12  | 57768956 | rs703842   | CYP27B1 | 0.966623       | 0.980215 |
| 12  | 57764205 | rs4646536 | CYP27B1 | 12  | 57768302 | rs10877012 | CYP27B1 | 0.916071       | 0.959577 |
| 12  | 57768956 | rs703842  | CYP27B1 | 12  | 57768302 | rs10877012 | CYP27B1 | 0.916071       | 0.959577 |

Chr, Chromosome. BP, Physical position (base-pair).
