# Supplementary material for: Single Nucleotide Polymorphisms in the Vitamin D Metabolic Pathway as Survival Biomarkers in Colorectal Cancer
Source: MDPI journal article supplement (doi:10.3390/cancers15164077), 2023-08-12
Supplement: s1 [file s1]

Table S9. Influence of gene polymorphisms on overall survival of 127 CRC patients.

| Gen     | SNPs              | Genotype | OS  |        |          |                   |                  |          |                      |                   |              |
|---------|-------------------|----------|-----|--------|----------|-------------------|------------------|----------|----------------------|-------------------|--------------|
|         |                   |          | N   | Events | MST (mo) | CI <sub>95%</sub> | Log-rank p-value | Ref. cat | Univariate Cox Model |                   |              |
|         |                   |          |     |        |          |                   |                  |          | HR                   | CI <sub>95%</sub> | p-value      |
| VDR     | rs1544410 (BsmI)  | TT       | 33  | 12     | 108.5    | 41.9-NR           | 0.800            | -        | -                    | -                 | -            |
|         |                   | CT       | 47  | 18     | 62.3     | 40.3-NR           |                  |          |                      |                   |              |
|         |                   | CC       | 47  | 16     | 82.3     | 65.0-NR           |                  |          |                      |                   |              |
|         |                   | T        | 80  | 30     | 108.5    | 48.6-NR           | 0.600            | -        | -                    | -                 | -            |
|         |                   | C        | 94  | 34     | 82.3     | 61.3              | 0.900            | -        | -                    | -                 | -            |
|         | rs11568820 (Cdx2) | TT       | 6   | 0      | NR       | NR-NR             | 0.300            | -        | -                    | -                 | -            |
|         |                   | CT       | 45  | 21     | 65.5     | 48.9-NR           |                  |          |                      |                   |              |
|         |                   | CC       | 76  | 25     | 108.5    | 62.1-NR           |                  |          |                      |                   |              |
|         |                   | T        | 51  | 21     | 75.9     | 52.0-NR           | 0.400            | -        | -                    | -                 | -            |
|         |                   | C        | 121 | 46     | 82.3     | 61.3-NR           | 0.200            | -        | -                    | -                 | -            |
|         | rs2228570 (FokI)  | GG       | 52  | 20     | 75.9     | 58.5-NR           | 0.900            | -        | -                    | -                 | -            |
|         |                   | AG       | 63  | 23     | 114.9    | 52.1-NR           |                  |          |                      |                   |              |
|         |                   | AA       | 12  | 3      | NR       | 78.4-NR           |                  |          |                      |                   |              |
|         |                   | G        | 115 | 43     | 82.3     | 61.3-NR           | 0.800            | -        | -                    | -                 | -            |
|         |                   | A        | 75  | 26     | 114.9    | 53.5-NR           | 0.700            | -        | -                    | -                 | -            |
|         | rs7975232 (ApaI)  | AA       | 48  | 21     | 48.9     | 39.6-NR           | <b>0.090</b>     | CC       | 2.181                | 0.962-4.944       | <b>0.062</b> |
|         |                   | AC       | 51  | 17     | 114.9    | 61.3-NR           |                  |          | 1.268                | 0.542-2.964       | 0.584        |
|         |                   | CC       | 28  | 8      | NR       | 75.9-NR           |                  |          | 1                    | -                 | -            |
|         |                   | A        | 99  | 38     | 65.5     | 52.0-NR           | 0.200            | -        | -                    | -                 | -            |
|         |                   | C        | 79  | 25     | 134.5    | 69.3-NR           | <b>0.030</b>     | C        | 1.187                | 1.039-3.771       | <b>0.037</b> |
|         | rs731236 (TaqI)   | GG       | 27  | 11     | 41.9     | 36.3-NR           | <b>0.090</b>     | AG       | 2.409                | 0.818-3.271       | <b>0.034</b> |
|         |                   | AG       | 48  | 14     | 134.5    | 62.3-NR           |                  |          | 1                    | -                 | -            |
|         |                   | AA       | 52  | 21     | 75.9     | 58.5-NR           |                  |          | 1.635                | 1.067-5.436       | <b>0.164</b> |
|         |                   | G        | 75  | 25     | 108.5    | 53.5-NR           | 0.500            | -        | -                    | -                 | -            |
|         |                   | A        | 100 | 35     | 134.5    | 65.0-NR           | <b>0.080</b>     | A        | 1.825                | 0.915- 3.637      | <b>0.087</b> |
| CYP27B1 | rs4646536         | AA       | 7   | 31     | 75.9     | 53.5-NR           | 0.600            | -        | -                    | -                 | -            |
|         |                   | AG       | 42  | 11     | NR       | 48.9-NR           |                  |          |                      |                   |              |
|         |                   | GG       | 14  | 4      | 114.9    | 62.1-NR           |                  |          |                      |                   |              |
|         |                   | A        | 113 | 42     | 78.4     | 58.5-NR           | 0.500            | -        | -                    | -                 | -            |
|         |                   | G        | 56  | 15     | NR       | 62.1-NR           | 0.300            | -        | -                    | -                 | -            |
|         | rs3782130         | CC       | 13  | 4      | 114.9    | 62.1-NR           | 0.500            | -        | -                    | -                 | -            |
|         |                   | CG       | 43  | 11     | NR       | 48.9-NR           |                  |          |                      |                   |              |
|         |                   | GG       | 71  | 31     | 75.9     | 53.5-NR           |                  |          |                      |                   |              |
|         |                   | C        | 56  | 15     | NR       | 62.1-NR           | 0.200            | -        | -                    | -                 | -            |
|         |                   | G        | 114 | 42     | 78.4     | 58.5-NR           | 0.500            | -        | -                    | -                 | -            |
|         | rs10877012        | TT       | 12  | 4      | 114.9    | 62.1-NR           | 0.400            | -        | -                    | -                 | -            |
|         |                   | GT       | 45  | 11     | NR       | 61.3-NR           |                  |          |                      |                   |              |
|         |                   | GG       | 70  | 31     | 69.3     | 53.5-NR           |                  |          |                      |                   |              |
|         |                   | T        | 57  | 15     | NR       | 62.1-NR           | 0.200            | -        | -                    | -                 | -            |
|         |                   | G        | 115 | 42     | 82.3     | 58.5-NR           | 0.800            | -        | -                    | -                 | -            |
|         | rs703842          | GG       | 14  | 4      | 114.9    | 62.1-NR           | 0.600            | -        | -                    | -                 | -            |
|         |                   | AG       | 42  | 11     | NR       | 48.9-NR           |                  |          |                      |                   |              |

|                                                                                                                     |            |    |     |    |       |         |       |    |       |             |       |
|---------------------------------------------------------------------------------------------------------------------|------------|----|-----|----|-------|---------|-------|----|-------|-------------|-------|
|                                                                                                                     |            | AA | 71  | 31 | 75.9  | 53.5-NR |       |    |       |             |       |
|                                                                                                                     |            | G  | 56  | 15 | 114.9 | 62.1-NR | 0.300 | -  | -     | -           | -     |
|                                                                                                                     |            | A  | 113 | 42 | 78.4  | 58.5-NR | 0.500 | -  | -     | -           | -     |
| CYP24A1                                                                                                             | rs6068816  | CC | 89  | 30 | 82.3  | 58.5-NR | 0.200 | -  | -     | -           | -     |
|                                                                                                                     |            | CT | 28  | 10 | 114.9 | 40.4-NR |       |    |       |             |       |
|                                                                                                                     |            | TT | 10  | 6  | 61.3  | 23.7-NR |       |    |       |             |       |
|                                                                                                                     |            | C  | 117 | 40 | 108.5 | 62.3-NR | 0.060 | C  | 2.244 | 0.946-5.327 | 0.067 |
|                                                                                                                     |            | T  | 38  | 16 | 75.9  | 39.6-NR | 0.500 | -  | -     | -           | -     |
|                                                                                                                     | rs4809957  | GG | 8   | 2  | 40.3  | 35.0-NR | 0.900 | -  | -     | -           | -     |
|                                                                                                                     |            | GA | 37  | 14 | 82.3  | 58.5-NR |       |    |       |             |       |
|                                                                                                                     |            | AA | 82  | 30 | 114.9 | 56.2-NR |       |    |       |             |       |
|                                                                                                                     |            | G  | 45  | 16 | 82.3  | 58.5-NR | 0.800 | -  | -     | -           | -     |
|                                                                                                                     |            | A  | 119 | 44 | 108.5 | 62.1-NR | 0.800 | -  | -     | -           | -     |
| CYP2R1                                                                                                              | rs10741657 | GG | 57  | 19 | 108.5 | 62.1-NR | 0.800 | -  | -     | -           | -     |
|                                                                                                                     |            | AG | 56  | 21 | 114.9 | 52.0-NR |       |    |       |             |       |
|                                                                                                                     |            | AA | 14  | 6  | 75.9  | 58.5-NR |       |    |       |             |       |
|                                                                                                                     |            | G  | 113 | 40 | 108.5 | 61.3-NR | 0.900 | -  | -     | -           | -     |
|                                                                                                                     |            | A  | 70  | 27 | 75.9  | 53.5-NR | 0.600 | -  | -     | -           | -     |
| GC                                                                                                                  | rs7041     | AA | 27  | 5  | NR    | NR-NR   | 0.010 | AA | 1     | -           | -     |
|                                                                                                                     |            | AC | 71  | 30 | 61.3  | 41.9-NR |       |    | 3.514 | 1.359-9.088 | 0.009 |
|                                                                                                                     |            | CC | 29  | 11 | 114.9 | 65.0-NR |       |    | 1.997 | 0.692-5.761 | 0.201 |
|                                                                                                                     |            | A  | 98  | 35 | 69.3  | 56.2-NR | 0.500 | -  | -     | -           | -     |
|                                                                                                                     |            | C  | 100 | 41 | 65.5  | 53.5-NR | 0.020 | AA | 2.914 | 1.149-7.393 | 0.020 |
| HR, hazard ratio. IC <sub>95%</sub> , 95% confidence interval. MST, median survival time (months). NR, not reached. |            |    |     |    |       |         |       |    |       |             |       |
