# Supplementary material for: Single Nucleotide Polymorphisms in the Vitamin D Metabolic Pathway as Survival Biomarkers in Colorectal Cancer
Source: MDPI journal article supplement (doi:10.3390/cancers15164077), 2023-08-12
Supplement: s1 [file s1]

Table S4. Hardy-Weinberg Equilibrium (OS).

| Chr | SNP        | Sample     | Gen     | Minor Allele | Major Allele | Genotype counts | Observed heterozygosity | Expected heterozygosity | p-value       |
|-----|------------|------------|---------|--------------|--------------|-----------------|-------------------------|-------------------------|---------------|
| 4   | rs7041     | All        | GC      | A            | C            | 27/71/29        | 0.5591                  | 0.4999                  | 0.2169        |
| 4   | rs7041     | Success    | GC      | A            | C            | 5/30/11         | 0.6522                  | 0.4915                  | <b>0.0394</b> |
| 4   | rs7041     | No Success | GC      | A            | C            | 22/41/18        | 0.5062                  | 0.4988                  | 1             |
| 11  | rs10741657 | All        | CYP2R1  | A            | G            | 14/56/57        | 0.4409                  | 0.4427                  | 1             |
| 11  | rs10741657 | Success    | CYP2R1  | A            | G            | 6/21/19         | 0.4565                  | 0.4601                  | 1             |
| 11  | rs10741657 | No Success | CYP2R1  | A            | G            | 8/35/38         | 0.4321                  | 0.4314                  | 1             |
| 12  | rs1544410  | All        | VDR     | T            | C            | 33/47/47        | 0.3701                  | 0.4939                  | <b>0.0067</b> |
| 12  | rs1544410  | Success    | VDR     | T            | C            | 12/18/16        | 0.3913                  | 0.4962                  | 0.1491        |
| 12  | rs1544410  | No Success | VDR     | T            | C            | 21/29/31        | 0.358                   | 0.4924                  | <b>0.0140</b> |
| 12  | rs11568820 | All        | VDR     | T            | C            | 6/45/76         | 0.3543                  | 0.3481                  | 1             |
| 12  | rs11568820 | Success    | VDR     | T            | C            | 0/21/25         | 0.4565                  | 0.3523                  | 0.0868        |
| 12  | rs11568820 | No Success | VDR     | T            | C            | 6/24/51         | 0.2963                  | 0.3457                  | 0.2021        |
| 12  | rs2228570  | All        | VDR     | A            | G            | 12/63/52        | 0.4961                  | 0.4504                  | 0.3255        |
| 12  | rs2228570  | Success    | VDR     | A            | G            | 3/23/20         | 0.500                   | 0.4317                  | 0.4926        |
| 12  | rs2228570  | No Success | VDR     | A            | G            | 9/40/32         | 0.4938                  | 0.4597                  | 0.6308        |
| 12  | rs7975232  | All        | VDR     | C            | A            | 28/51/48        | 0.4016                  | 0.4876                  | <b>0.0468</b> |
| 12  | rs7975232  | Success    | VDR     | C            | A            | 8/17/21         | 0.3696                  | 0.4601                  | 0.2031        |
| 12  | rs7975232  | No Success | VDR     | C            | A            | 20/34/27        | 0.4198                  | 0.4963                  | 0.1807        |
| 12  | rs731236   | All        | VDR     | G            | A            | 27/48/52        | 0.3780                  | 0.4806                  | <b>0.0167</b> |
| 12  | rs731236   | Success    | VDR     | G            | A            | 11/14/21        | 0.3043                  | 0.4764                  | <b>0.0150</b> |
| 12  | rs731236   | No Success | VDR     | G            | A            | 16/34/31        | 0.4198                  | 0.4829                  | 0.2530        |
| 12  | rs3782130  | All        | CYP27B1 | C            | G            | 13/43/71        | 0.3386                  | 0.3957                  | 0.1159        |
| 12  | rs3782130  | Success    | CYP27B1 | C            | G            | 04/11/1931      | 0.2391                  | 0.3277                  | 0.0743        |
| 12  | rs3782130  | No Success | CYP27B1 | C            | G            | 9/32/40         | 0.3951                  | 0.4268                  | 0.6013        |
| 12  | rs4646536  | All        | CYP27B1 | G            | A            | 14/42/71        | 0.3307                  | 0.3993                  | 0.0727        |
| 12  | rs4646536  | Success    | CYP27B1 | G            | A            | 04/11/1931      | 0.2391                  | 0.3277                  | 0.0743        |
| 12  | rs4646536  | No Success | CYP27B1 | G            | A            | 10/31/40        | 0.3827                  | 0.4314                  | 0.3091        |
| 12  | rs703842   | All        | CYP27B1 | G            | A            | 14/42/71        | 0.3307                  | 0.3993                  | 0.0727        |
| 12  | rs703842   | Success    | CYP27B1 | G            | A            | 04/11/1931      | 0.2391                  | 0.3277                  | 0.0743        |
| 12  | rs703842   | No Success | CYP27B1 | G            | A            | 10/31/40        | 0.3827                  | 0.4314                  | 0.3091        |
| 12  | rs10877012 | All        | CYP27B1 | T            | G            | 12/45/70        | 0.3543                  | 0.3957                  | 0.2617        |
| 12  | rs10877012 | Success    | CYP27B1 | T            | G            | 04/11/1931      | 0.2391                  | 0.3277                  | 0.0743        |
| 12  | rs10877012 | No Success | CYP27B1 | T            | G            | 8/34/39         | 0.4198                  | 0.4268                  | 1             |
| 20  | rs6068816  | All        | CYP24A1 | T            | C            | 10/28/89        | 0.2205                  | 0.3065                  | <b>0.0029</b> |
| 20  | rs6068816  | Success    | CYP24A1 | T            | C            | 06/10/1930      | 0.2174                  | 0.3639                  | <b>0.0098</b> |
| 20  | rs6068816  | No Success | CYP24A1 | T            | C            | 4/18/59         | 0.2222                  | 0.2695                  | 0.1114        |
| 20  | rs4809957  | All        | CYP24A1 | G            | A            | 8/37/82         | 0.2913                  | 0.3302                  | 0.1826        |
| 20  | rs4809957  | Success    | CYP24A1 | G            | A            | 2/14/30         | 0.3043                  | 0.3147                  | 1             |
| 20  | rs4809957  | No Success | CYP24A1 | G            | A            | 6/23/52         | 0.2840                  | 0.3387                  | 0.1831        |

Chr, chromosome.
