# Supplementary material for: Single Nucleotide Polymorphisms in the Vitamin D Metabolic Pathway as Survival Biomarkers in Colorectal Cancer
Source: MDPI journal article supplement (doi:10.3390/cancers15164077), 2023-08-12
Supplement: s1 [file s1]

|                                     |     |    |       |          |       |                                 |       |              |       |
|-------------------------------------|-----|----|-------|----------|-------|---------------------------------|-------|--------------|-------|
| I, II or IIIA                       | 71  | 27 | 134.5 | 82.3-NR  | 0.001 | I, II, IIIA                     | 2.733 | 1.469- 5.087 | 0.002 |
| IIIB, IV or IVB                     | 56  | 19 | 52.1  | 36.3-NR  |       |                                 |       |              |       |
| TNM stage                           |     |    |       |          |       |                                 |       |              |       |
| I/II                                | 11  | 4  | 134.5 | 35.0-NR  | 0.900 | -                               | -     | -            | -     |
| III/IV                              | 116 | 42 | 82.3  | 62.1-NR  |       |                                 |       |              |       |
| Primary tumor resection             |     |    |       |          |       |                                 |       |              |       |
| Yes                                 | 119 | 42 | 108.5 | 62.3-NR  | 0.100 | -                               | -     | -            | -     |
| No                                  | 8   | 4  | 20.5  | 15.3-NR  |       |                                 |       |              |       |
| Adjuvant chemotherapy               |     |    |       |          |       |                                 |       |              |       |
| Fluoropyrimidines                   | 35  | 9  | 41.9  | 40.4-NR  | 0.003 | Fluoropyrimidines + Oxaliplatin | 2.059 | 0.407-1.776  | 0.076 |
| Fluoropyrimidines + Oxaliplatin     | 70  | 24 | 134.5 | 108.5-NR |       |                                 | 1     | -            | -     |
| Fluoropyrimidines + biologics drugs | 19  | 12 | 41.5  | 35.8-NR  |       |                                 | 3.123 | 0.358-3.177  | 0.001 |
| None                                | 3   | 1  | 30.2  | NR-NR    |       |                                 | 6.554 | 1.053-1.786  | 0.074 |

ADC, adenocarcinoma. CRC, colorectal cancer. ECOG, Eastern Cooperative Oncology Group. HR, hazard ratio. CI<sub>95%</sub>, 95% confidence interval. MST, median survival time (months). NR, not reached. OS, Overall survival. TNM, Classification of Malignant Tumors.
