# Supplementary material for: Single Nucleotide Polymorphisms in the Vitamin D Metabolic Pathway as Survival Biomarkers in Colorectal Cancer
Source: MDPI journal article supplement (doi:10.3390/cancers15164077), 2023-08-12
Supplement: s1 [file s1]

|                                     |     |    |       |           |        |                                 |       |             |        |
|-------------------------------------|-----|----|-------|-----------|--------|---------------------------------|-------|-------------|--------|
| Yes                                 | 36  | 30 | 19.8  | 14.2-59.2 | <0.001 | No                              | 3.810 | 2.238-6.488 | <0.001 |
| No                                  | 91  | 26 | 125.9 | 125.9-NA  |        |                                 |       |             |        |
| Stage                               |     |    |       |           |        |                                 |       |             |        |
| I, II or IIIA                       | 71  | 24 | 125   | 125.4-NA  | <0.001 | I, II, IIIA                     | 3.934 | 2.239-6.913 | <0.001 |
| IIIB, IV or IVB                     | 56  | 32 | 35    | 17.7-60.6 |        |                                 |       |             |        |
| TNM stage                           |     |    |       |           |        |                                 |       |             |        |
| I/II                                | 11  | 4  | 125.9 | 43.8-NR   | 0.600  | -                               | -     | -           | -      |
| III/IV                              | 116 | 52 | 63.3  | 38.6-NR   |        |                                 |       |             |        |
| Primary tumor resection             |     |    |       |           |        |                                 |       |             |        |
| Yes                                 | 119 | 49 | 105.2 | 51.1-NA   | 0.008  | Yes                             | 2.902 | 1.276-6.600 | 0.011  |
| No                                  | 8   | 7  | 14.1  | 10.3-NA   |        |                                 |       |             |        |
| Adjuvant chemotherapy               |     |    |       |           |        |                                 |       |             |        |
| Fluoropyrimidines                   | 35  | 15 | 38.1  | 18.6-NA   | <0.001 | Fluoropyrimidines + Oxaliplatin | 2.545 | 0.342-2.734 | 0.006  |
| Fluoropyrimidines + Oxaliplatin     | 70  | 24 | 125.4 | 105.8-NA  |        |                                 | 1     | -           | -      |
| Fluoropyrimidines + biologics drugs | 19  | 16 | 23.7  | 16.7-60.6 |        |                                 | 3.497 | 0.328-3.821 | <0.001 |
| None                                | 3   | 1  | NA    | 11.9-NA   |        |                                 | 3.124 | 1.039-1.096 | 0.273  |

ADC, adenocarcinoma. CRC, colorectal cancer. ECOG, Eastern Cooperative Oncology Group. HR, hazard ratio. CI<sub>95%</sub>, 95% confidence interval. MST, median survival time (months). NR, not reached. PFS, Progression-free survival. TNM, Classification of Malignant Tumors.
