# Supplementary material for: Single Nucleotide Polymorphisms in the Vitamin D Metabolic Pathway as Survival Biomarkers in Colorectal Cancer
Source: MDPI journal article supplement (doi:10.3390/cancers15164077), 2023-08-12
Supplement: s1 [file s1]

Table S8. Frequencies of the *CYP27B1* haplotypes in 127 CRC patients.

| <b><i>CYP27B1</i><br/>rs3782130</b> | <b><i>CYP27B1</i><br/>rs4646536</b> | <b><i>CYP27B1</i><br/>rs703842</b> | <b><i>CYP27B1</i><br/>rs10877012</b> | <b>Total</b> | <b>Cumulative<br/>frequency</b> |
|-------------------------------------|-------------------------------------|------------------------------------|--------------------------------------|--------------|---------------------------------|
| G                                   | A                                   | A                                  | G                                    | 0.7165       | 0.7165                          |
| C                                   | G                                   | G                                  | T                                    | 0.2598       | 0.9764                          |
| G                                   | G                                   | G                                  | G                                    | 0.0079       | 0.9842                          |
| C                                   | G                                   | G                                  | G                                    | 0.0040       | 0.9882                          |
| G                                   | A                                   | A                                  | T                                    | 0.0040       | 0.9921                          |
| C                                   | A                                   | G                                  | T                                    | 0.0039       | 0.9961                          |
| C                                   | G                                   | A                                  | T                                    | 0.0039       | 1                               |
