# Supplementary material for: Single Nucleotide Polymorphisms in the Vitamin D Metabolic Pathway as Survival Biomarkers in Colorectal Cancer
Source: MDPI journal article supplement (doi:10.3390/cancers15164077), 2023-08-12
Supplement: s1 [file s1]

Table S11. Distribution of *CYP27B1* haplotypes in overall survival in 127 CRC patients (censored/uncensored).

| <i>CYP27B1</i><br>Haplotype | Haplotype frequencies in<br>Censored (%) | Haplotype frequencies in<br>Uncensored (%) |
|-----------------------------|------------------------------------------|--------------------------------------------|
| CGGG                        | 0.006191                                 | 0.000011                                   |
| CGGT                        | 0.290105                                 | 0.206511                                   |
| CGAT                        | 0.006173                                 | 0.000000                                   |
| CAGT                        | 0.006173                                 | 0.000000                                   |
| GGGG                        | 0.012346                                 | 0.000000                                   |
| GAAG                        | 0.666648                                 | 0.793467                                   |
| GAAT                        | 0.012364                                 | 0.000011                                   |
